# Supplementary material for: Cell Therapy Transplant Canada (CTTC) Consensus-Based Guideline 2024 for Management and Treatment of Chronic Graft-Versus-Host Disease and Future Directions for Development
Source: MDPI journal article supplement (doi:10.3390/curroncol31030108), 2024-03-08
Supplement: s1 [file s1]

## Supplementary Material

**Table S1.** Summary of Chronic GvHD systematic review, reprinted with permission from Ref. [11], 2024 American Society of Hematology.

| No. | System/Others   | Inquire/description                                                                                                                          |
|-----|-----------------|----------------------------------------------------------------------------------------------------------------------------------------------|
| 1   | Skin            | Skin feels tight or hard, increased dryness, pruritus, or looks different (i.e. new rash, papules, discoloration, shining scar-like, scaly)? |
| 2   | Sweat glands    | Inability to sweat or to keep body warm?                                                                                                     |
| 3   | Skin appendages | Loss of hair (scalp or body including brows or lashes), or nail changes (ridges or brittle, loss)?                                           |
| 4   | Fasciae/Joints  | Stiffness or pain in the wrists, fingers, or other joints?                                                                                   |
| 5   | Eyes            | Eye dryness, sensitivity to wind or dry environments (air conditioning), pain?                                                               |
| 6   | Mouth           | Oral dryness, taste alterations, sensitivities (spicy/carbonated drinks, toothpaste), ulcers/sores, pain?                                    |
| 7   | Esophagus       | Foods or pills gets stuck upon swallowing?                                                                                                   |
| 8   | Lungs           | Cough, dyspnea (on exertion or rest) or wheezing?                                                                                            |
| 9   | Genital tract   | Vaginal dryness, pain, dyspareunia (female); pain or dysuria due to stenosis of urethra (male)?                                              |
| 10  | Weight loss     | Unexplained weight loss or inability to gain weight (pancreatic insufficiency or hypercatabolism)?                                           |

Adopted from *Blood* **2015**, 125, 606–615 [11].
